# Supplementary material for: The development of a highly selective fluorescent probe for the rapid detection of HClO in living cells and zebrafish
Source: Royal Society of Chemistry journal article supplement (doi:10.1039/d1nj00891a), 2021-01-01
Supplement: d1nj00891a1.pdf [file d1nj00891a1.pdf]

Supporting Information for

**Development of a highly selective fluorescent probe for the rapid  
detection of HClO in living cells and zebrafish**

Xing Liang, Yonghui Huo, Jun Yan, Ling Huang, Weiying Lin \*

Guangxi Key Laboratory of Electrochemical Energy Materials, Institute of Optical Materials and  
Chemical Biology, School of Chemistry and Chemical Engineering, Guangxi University, Nanning,  
Guangxi 530004, P. R. China

## Table of contents

|                                                                                                           |          |
|-----------------------------------------------------------------------------------------------------------|----------|
| Scheme S1. The synthesis of fluorescent probe BM-HA. ....                                                 | S3       |
| Fig. S1. DFT optimized structures .....                                                                   | S3       |
| Fig. S2. The influence of different solvent system on the fluorescence intensity .....                    | S3       |
| Fig. S3. Reaction-time profile .....                                                                      | S4       |
| Fig. S4. The time-dependent fluorescence spectra .....                                                    | S4       |
| Fig. S5. UV-vis spectra .....                                                                             | S4       |
| Fig. S6. The liquid fluorescence image .....                                                              | S5       |
| Fig. S7. Absorption spectra and emission spectra of <b>BM</b> , <b>BM-HA</b> and <b>BM-HA + HCl</b> ..... | S5       |
| Fig. S8. Fluorescence spectra of various relevant species .....                                           | S5       |
| Fig. S9. The effects of pH on the fluorescence intensity .....                                            | S6       |
| Table S1. The absorption and emission values of functional calculation and experiment of <b>BM</b> ..     | S6       |
| Table S2. The experimental and calculated absorption and fluorescence emission of <b>BM</b> .....         | S6       |
| Table S3. The contribution percentage of each atom to HOMO, LUMO orbitals .....                           | S7       |
| Table S4. The contribution percentage of molecular fragment to HOMO, LUMO orbitals .....                  | S8       |
| Fig. S10. The atomic numbers of <b>BM-HA</b> and <b>BM</b> .....                                          | S8       |
| Fig. S11. Experimental and theory calculated fluorescence spectra of the compound <b>BM</b> .....         | S8       |
| Fig. S12. Cytotoxicity assays of probe at different concentrations for HeLa cells .....                   | S9       |
| Fig. S13.- Fig. S16. <sup>1</sup> H NMR, <sup>13</sup> C NMR, and HRMS spectra .....                      | S9 - S10 |

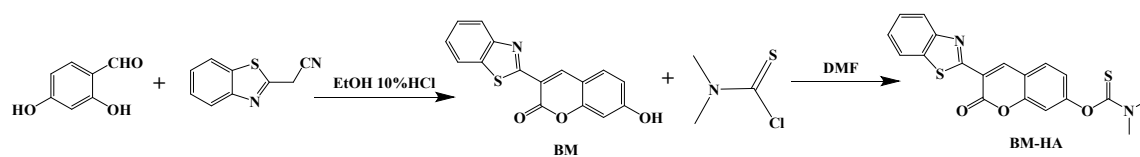

**Scheme S1.** The synthesis of fluorescent probe **BM-HA**.

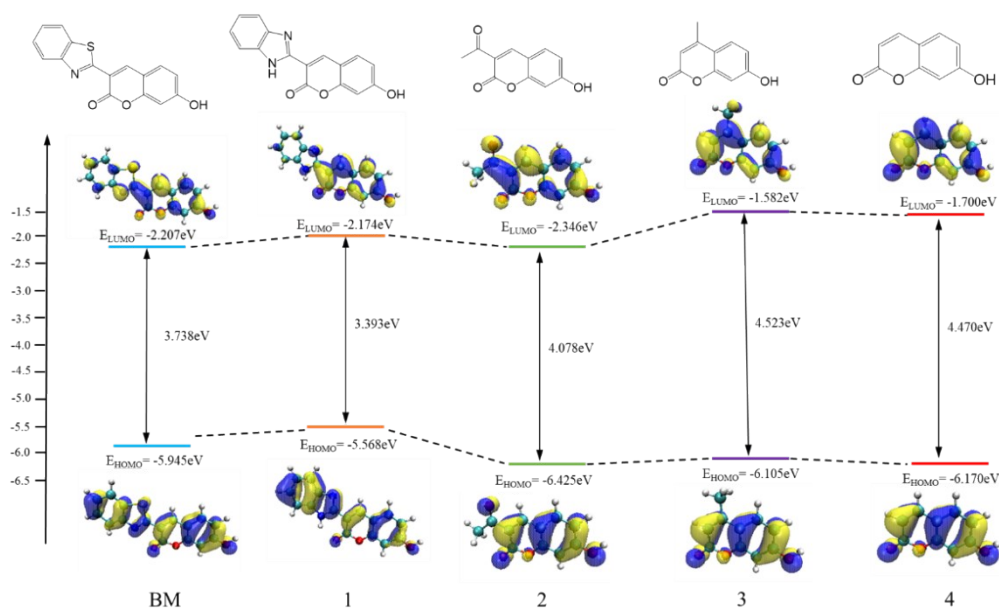

**Fig. S1.** DFT optimized structures and molecular orbital plots (LUMO and HOMO) of dyes **BM** and **1-4**.

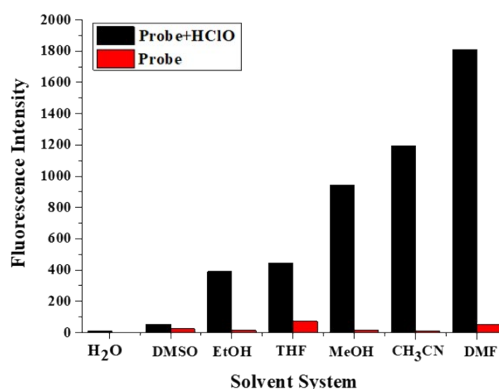

**Fig. S2.** The influence of different solvent system on the fluorescence intensity of probe **BM-HA** (10.0 μM) with HClO (30.0 μM).

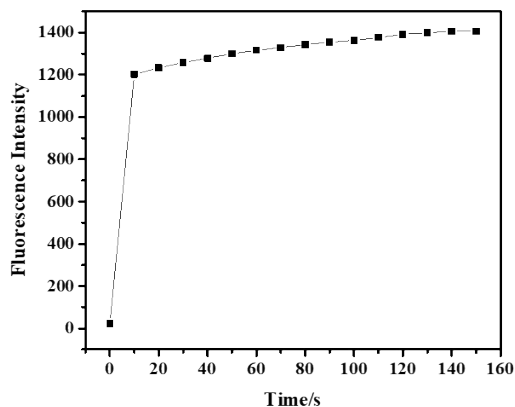

**Fig. S3.** Reaction-time profile of the probe **BM-HA** (10.0  $\mu\text{M}$ ) responses to **HClO** (30.0  $\mu\text{M}$ ). Fluorescence signals with  $\lambda_{\text{ex}} = 440 \text{ nm}$ ,  $\lambda_{\text{em}} = 490 \text{ nm}$ .

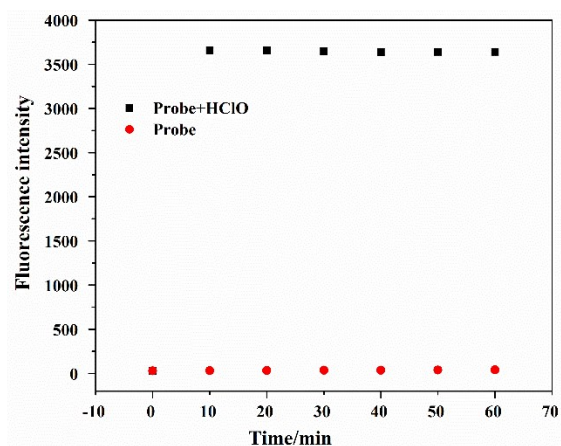

**Fig. S4.** The time-dependent fluorescence spectra of the probe **BM-HA** (10.0  $\mu\text{M}$ ) responses to **HClO** (40.0  $\mu\text{M}$ ). Fluorescence signals with  $\lambda_{\text{ex}} = 440 \text{ nm}$ ,  $\lambda_{\text{em}} = 490 \text{ nm}$ .

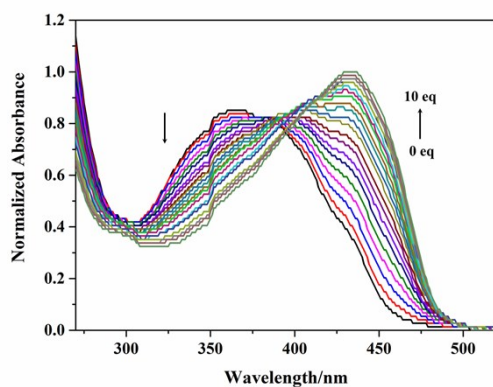

**Fig. S5.** UV-vis spectra of the probe **BM-HA** (10.0  $\mu\text{M}$ ) treated with different concentrations of **HClO**.

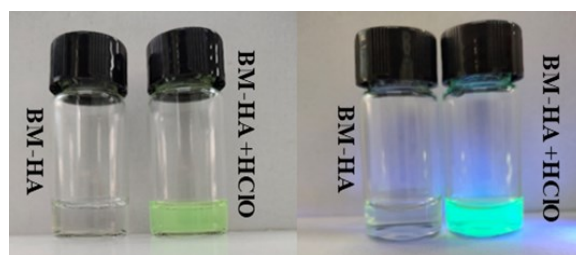

**Fig. S6.** The liquid fluorescence image of the probe **BM-HA** in the absence and presence of HClO in PBS buffer pH 7.4 that contained 1 % DMF, the left picture represented irradiation with natural light, the right picture showed irradiation with ultraviolet laser.

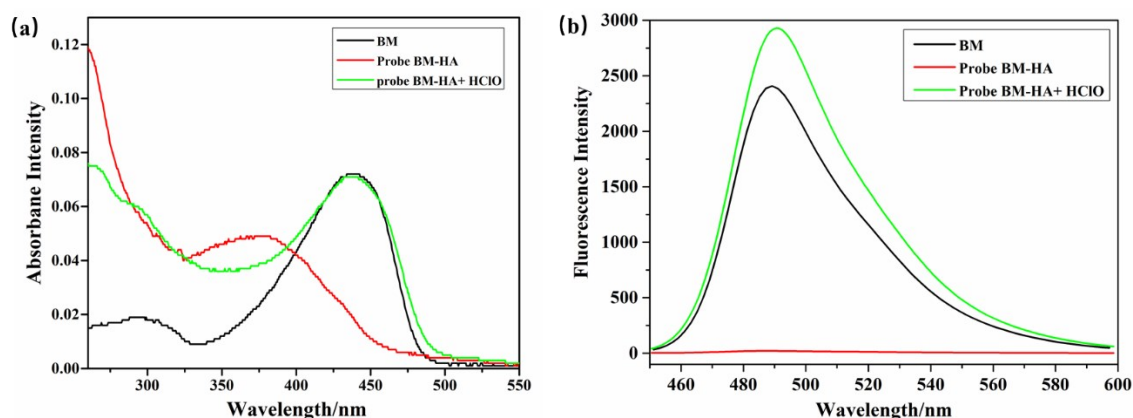

**Fig. S7.** Absorption spectra (a) and emission spectra (b) of the Compound **BM** (black line), the probe **BM-HA** (red line) and the probe **BM-HA + HClO** (green line).

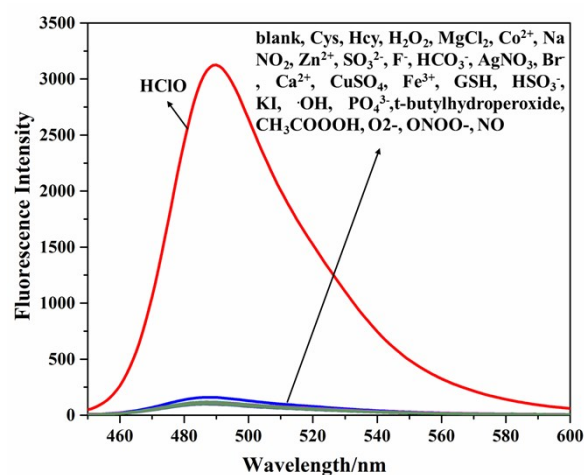

**Fig. S8.** Fluorescence spectra of the probe **BM-HA** (10.0  $\mu\text{M}$ ) to HClO (40.0  $\mu\text{M}$ ) over various relevant species (all 40.0  $\mu\text{M}$ ). Data shown in turn: blank, HClO, Cys, Hcy,  $\text{H}_2\text{O}_2$ ,  $\text{MgCl}_2$ ,  $\text{Co}^{2+}$ ,  $\text{NaNO}_2$ ,  $\text{Zn}^{2+}$ ,  $\text{SO}_3^{2-}$ ,  $\text{F}^-$ ,  $\text{HCO}_3^-$ ,  $\text{AgNO}_3$ ,  $\text{Br}^-$ ,  $\text{Ca}^{2+}$ ,  $\text{CuSO}_4$ ,  $\text{Fe}^{3+}$ , GSH,  $\text{HSO}_3^-$ , KI,  $\cdot\text{OH}$ ,  $\text{PO}_4^{3-}$ , t-butylhydroperoxide,  $\text{CH}_3\text{COOOH}$ ,  $\text{O}_2^-$ ,  $\text{ONOO}^-$ , NO, respectively.

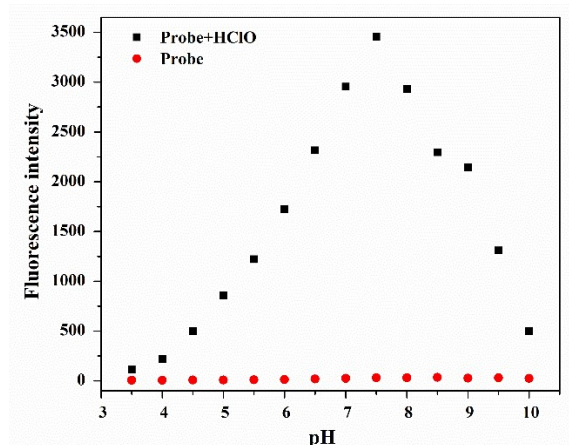

**Fig. S9.** The effects of pH on the fluorescence intensity of the probe **BM-HA** (10.0  $\mu$ M) for HClO (40.0  $\mu$ M).

**Table S1.** Compare the absorption and emission values of several functionals calculation and experiment of the compound **BM**.

|            | PBEPBE<br>(nm) | CAM-B3LYP<br>(nm) | B3PW91<br>(nm) | M062X<br>(nm) | B3LYP<br>(nm) | Experiment<br>(nm) |
|------------|----------------|-------------------|----------------|---------------|---------------|--------------------|
| absorption | 435.15 nm      | 338.05nm          | 379.65 nm      | 337.80 nm     | 381.76 nm     | 440 nm             |
| emission   | 527.65 nm      | 440.27 nm         | 476.64 nm      | 441.28 nm     | 482.34 nm     | 490 nm             |

**Table S2.** Comparison of experimental and calculated absorption and fluorescence emission for the compound **BM**.

|           |            | electronic<br>transition | $f^a$  | contrib                 | Calculation<br>(nm) |
|-----------|------------|--------------------------|--------|-------------------------|---------------------|
| <b>BM</b> | absorption | $S_0 \rightarrow S_1$    | 0.9707 | HOMO $\rightarrow$ LUMO | 381.76 nm           |
|           | emission   | $S_1 \rightarrow S_0$    | 1.3103 | LUMO $\rightarrow$ HOMO | 482.34 nm           |

**Table S3.** The contribution percentage of each atom to HOMO, LUMO orbitals of compounds **BM-HA** and **BM**.

| BM-FA         |              |             | BM            |             |              |
|---------------|--------------|-------------|---------------|-------------|--------------|
| Atomic number | HOMO (%)     | LUMO (%)    | Atomic number | HOMO (%)    | LUMO (%)     |
| C1            | 1.93         | 1.80        | C1            | 4.94        | 2.08         |
| C2            | 3.33         | 7.46        | C2            | 6.98        | 6.73         |
| C3            | 0.72         | 2.60        | C3            | 2.94        | 1.67         |
| C4            | 1.37         | 5.11        | C4            | 3.92        | 4.82         |
| C5            | 0.92         | 4.57        | C5            | 8.80        | 4.05         |
| C6            | 0.42         | 6.39        | C6            | 3.13        | 6.58         |
| C7            | 0.35         | 3.38        | C7            | 0.61        | 2.91         |
| C8            | 0.56         | 4.10        | C8            | 2.58        | 3.15         |
| C9            | 2.02         | 11.97       | C9            | 10.84       | 10.41        |
| C10           | 0.81         | 20.02       | <b>C10</b>    | <b>4.60</b> | <b>20.95</b> |
| O11           | 0.25         | 2.93        | O11           | 5.28        | 2.04         |
| C12           | 0.80         | 6.13        | C12           | 4.17        | 7.45         |
| N13           | 0.91         | 6.04        | N13           | 5.33        | 7.41         |
| C14           | 0.99         | 1.13        | C14           | 5.73        | 1.45         |
| C15           | 0.90         | 1.53        | C15           | 5.39        | 1.90         |
| S16           | 0.43         | 3.68        | S16           | 3.20        | 3.46         |
| C17           | 0.45         | 1.79        | C17           | 2.45        | 2.20         |
| C18           | 0.49         | 0.54        | C18           | 3.04        | 0.64         |
| C19           | 0.11         | 2.07        | C19           | 6.08        | 2.63         |
| C20           | 0.23         | 0.80        | C20           | 1.20        | 0.91         |
| O21           | 1.73         | 1.30        | O21           | 6.37        | 2.77         |
| C22           | 4.65         | 0.57        | H22           | 0.36        | 0.10         |
| N23           | 1.09         | 0.08        | H23           | 0.18        | 0.07         |
| C24           | 1.39         | 0.02        | H24           | 0.18        | 0.59         |
| C25           | 0.73         | 0.04        | H25           | 0.24        | 2.12         |
| <b>S26</b>    | <b>67.43</b> | <b>0.49</b> | H26           | 0.15        | 0.21         |
| H27           | 0.15         | 0.08        | H27           | 0.22        | 0.03         |
| H28           | 0.05         | 0.16        | H28           | 0.50        | 0.27         |
| H29           | 0.01         | 0.58        | H29           | 0.04        | 0.05         |
| H30           | 0.04         | 1.97        | H30           | 0.39        | 0.18         |
| H31           | 0.03         | 0.17        |               |             |              |
| H32           | 0.03         | 0.03        |               |             |              |
| H33           | 0.09         | 0.21        |               |             |              |
| H34           | 0.01         | 0.06        |               |             |              |
| H35           | 0.41         | 0.01        |               |             |              |
| H36           | 0.83         | 0.01        |               |             |              |
| H37           | 0.29         | 0.01        |               |             |              |
| H38           | 0.05         | 0.01        |               |             |              |
| H39           | 0.04         | 0.02        |               |             |              |
| H40           | 0.08         | 0.01        |               |             |              |

**Table S4.** The contribution percentage of molecular fragment to HOMO, LUMO orbitals of compounds **BM-HA** and **BM**.

| Molecular fragment        | BM-FA    |          | Molecular fragment | BM       |          |
|---------------------------|----------|----------|--------------------|----------|----------|
|                           | HOMO (%) | LUMO (%) |                    | HOMO (%) | LUMO (%) |
| benzothiazole             | 6.41     | 24.18    | benzothiazole      | 37.5     | 28.61    |
| coumarin                  | 12.93    | 73.12    | coumarin           | 55.58    | 68.27    |
| dimethylcarbamoylsulfonyl | 78.72    | 2.57     | Hydroxyl           | 6.76     | 2.95     |

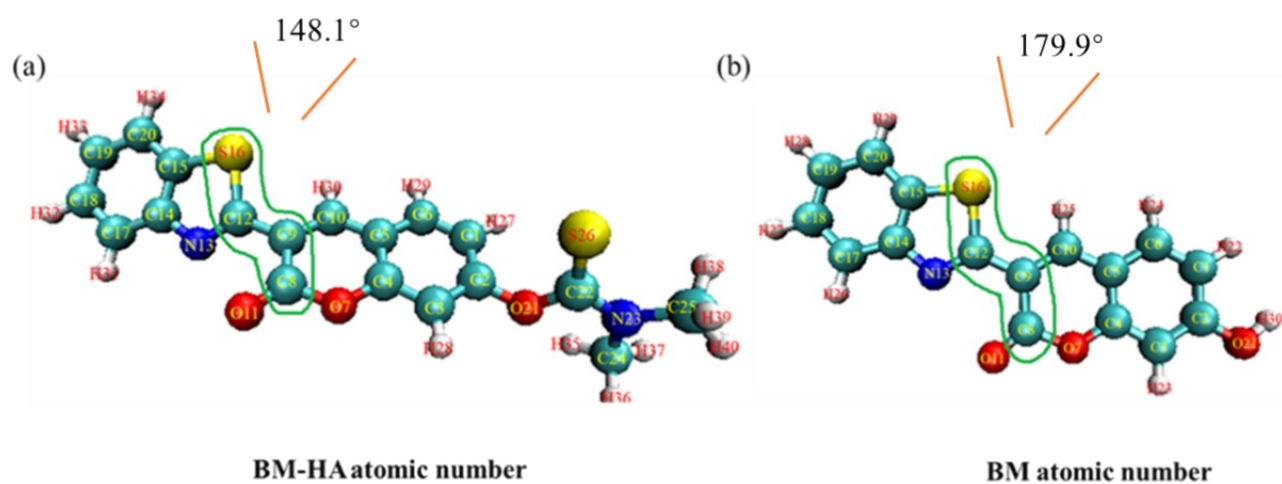

**Fig. S10.** The atomic numbers of the probe (a) **BM-HA** and the compound (b) **BM**.

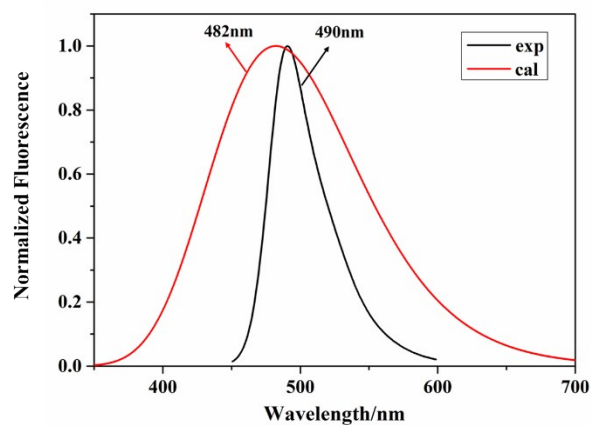

**Fig. S11.** Experimental and theory calculated fluorescence spectra of the compound **BM**.



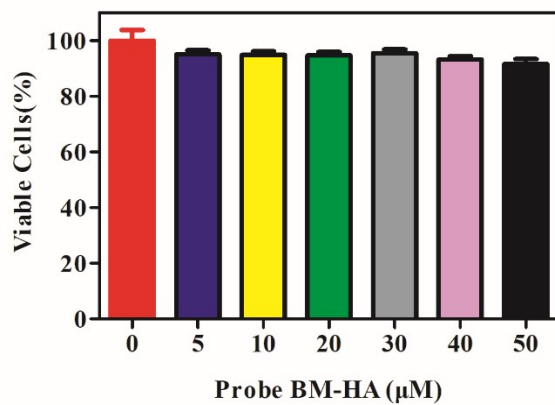

**Fig. S12.** Cytotoxicity assays of probe at different concentrations for HeLa cells.

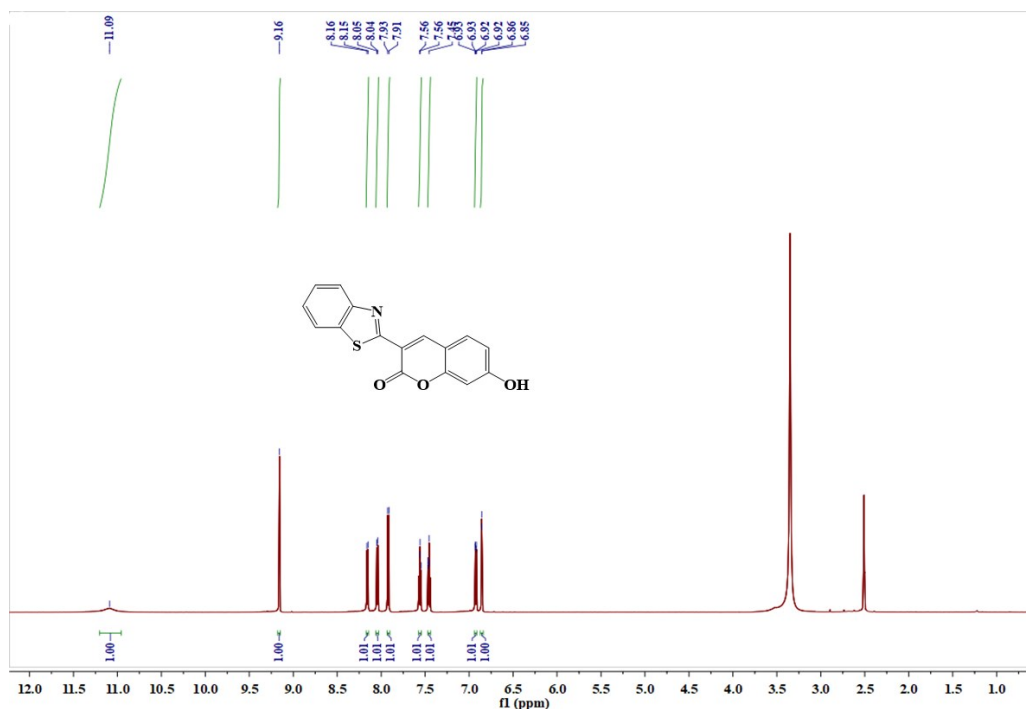

**Fig. S13.**  $^1\text{H}$  NMR spectra of the compound **BM** in  $\text{DMSO-}d_6$ .

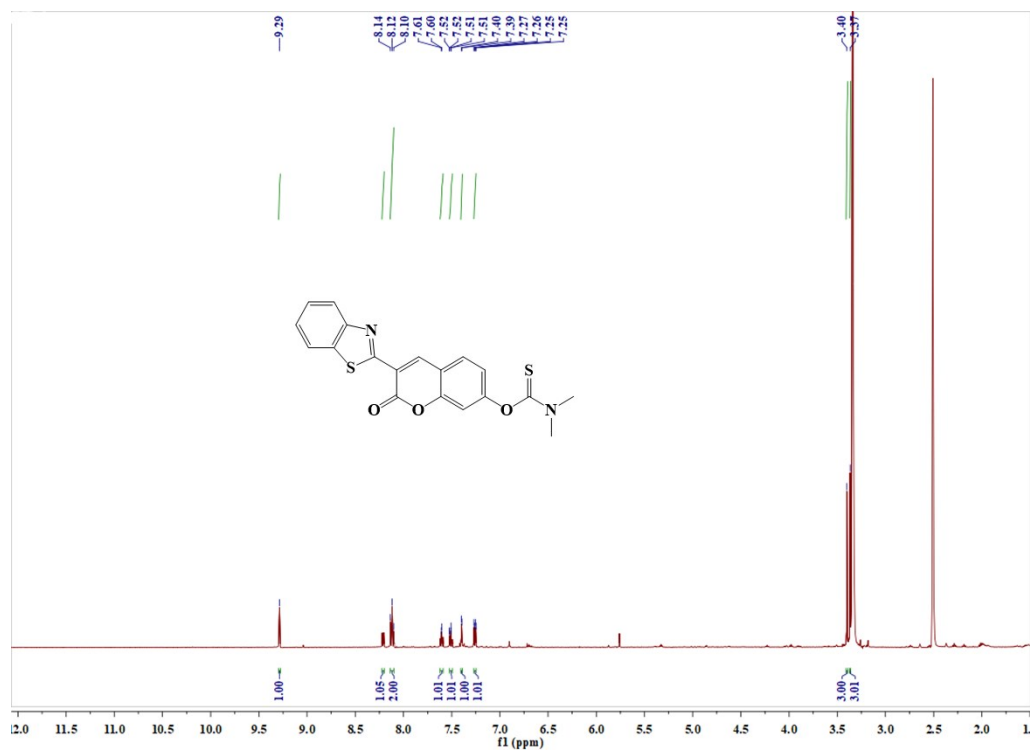

Fig. S14. <sup>1</sup>H NMR spectra of the compound **BM-HA** DMSO-*d*<sub>6</sub>.

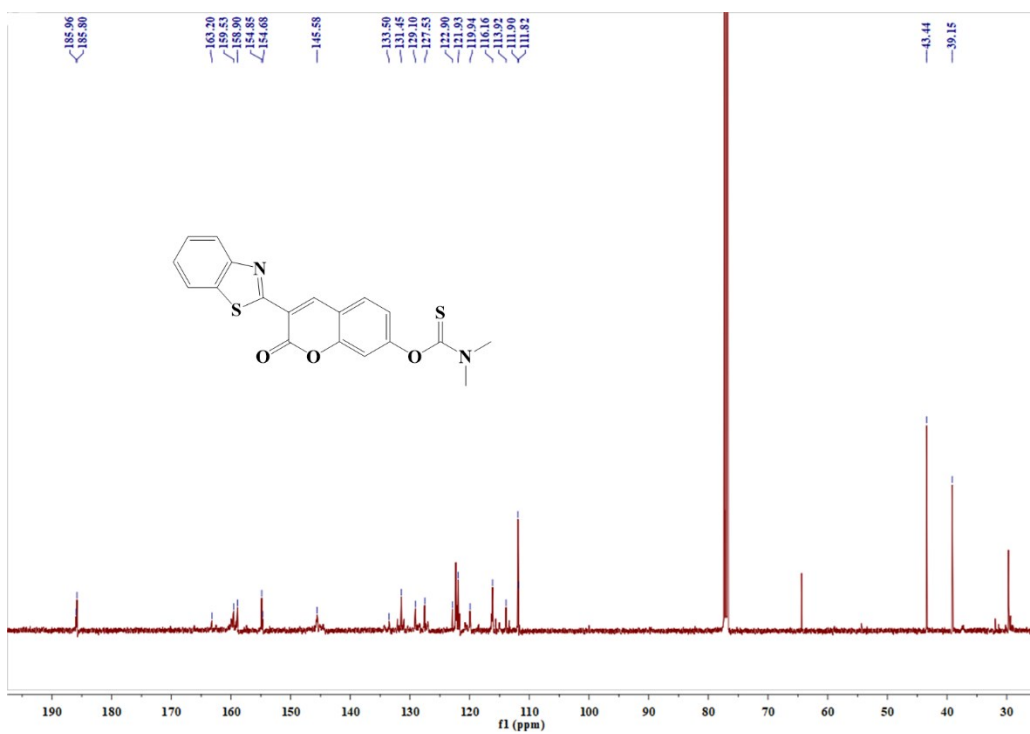

Fig. S15. <sup>13</sup>C NMR spectra of the compound **BM-HA** in CDCl<sub>3</sub>.

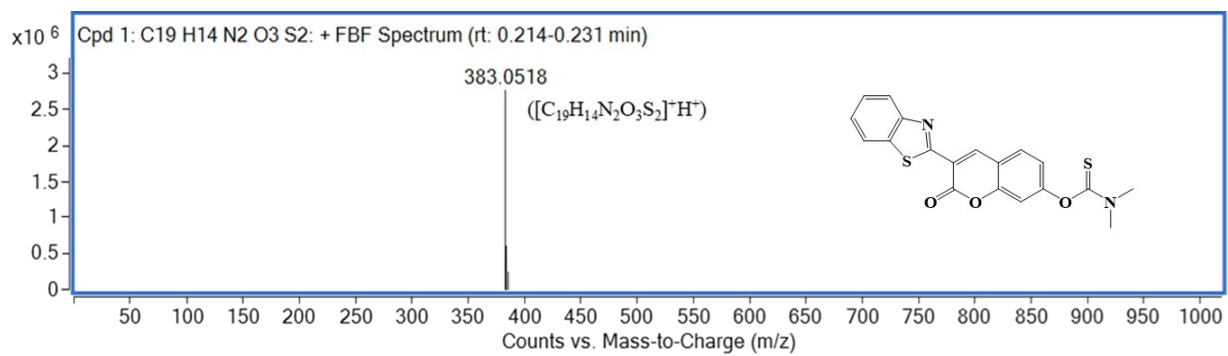

**Fig. S16.** HRMS spectra of the compound **BM-HA**.
